# Supplementary material for: Rational design of allosterically regulated toehold mediated strand displacement circuits for sensitive and on-site detection of small molecule metabolites
Source: Royal Society of Chemistry journal article supplement (doi:10.1039/d1an01488a), 2021-01-01
Supplement: d1an01488a1.pdf [file d1an01488a1.pdf]

## Supplementary Information

### **Rational design of allosterically regulated toehold mediated strand displacement circuit for sensitive and on-site detection of small molecule metabolites**

Haosi Lin, Alan F. Rodríguez-Serrano & I-Ming Hsing\*

Department of Chemical and Biological Engineering, Hong Kong University of Science and Technology, Clear Water Bay, Kowloon, Hong Kong, China

\* To whom correspondence should be addressed. Tel: (852) 2358 7122 E-mail: kehsing@ust.hk

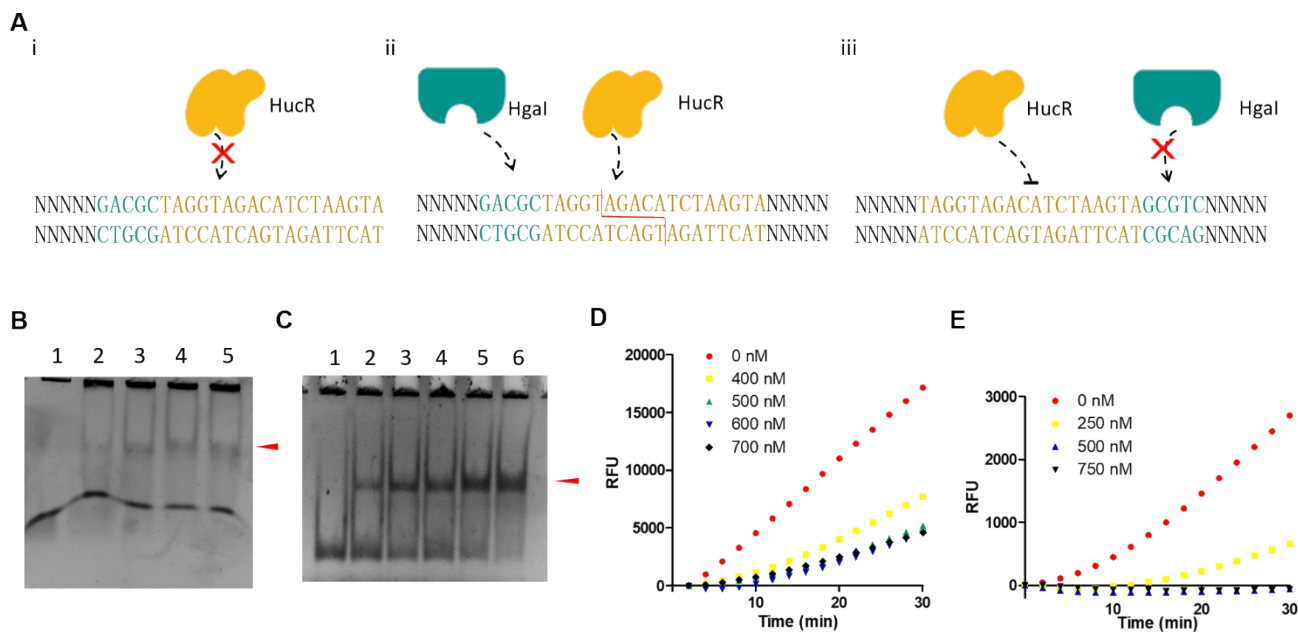

**Supplementary Figure S1.** Regulation of toehold mediated strand displacement (TMSD) by HucR. **(A)** Illustration of HucR-DNA binding and the protection from HgaI cleavage by HucR binding. Sequences in cyan indicate HgaI recognition site; sequences in gold indicate the HucO sequence; red line indicates the cleavage by HgaI. **(i)**: Upstream HgaI recognition site, no downstream sequence. **(ii)**: Upstream HgaI recognition site, random downstream sequence. **(iii)**: Random upstream sequence, downstream HgaI recognition site. Terms upstream and downstream are used in reference to HucO sequence. **(B)** EMSA for verifying HucR binding with HucO without extra sequences downstream as illustrated in **i** of panel **A**. 1: HucO = 50 nM; 2: HucO = 50 nM, HucR = 750 nM; 3: HucO = 50 nM, HucR = 1.25  $\mu$ M; 4: HucO = 50 nM, HucR = 2.5  $\mu$ M; 5: HucO = 50 nM, HucR = 5  $\mu$ M; HucR-DNA complex are marked by red triangle. **(C)** EMSA showing HucR binding to a template with downstream extension as illustrated in **ii** of panel **A**. 1: HucO = 50 nM; 2: HucO = 50 nM, HucR = 50 nM; 3: HucO = 50 nM, HucR = 100 nM; 4: HucO = 50 nM, HucR = 150 nM; 5: HucO = 50 nM, HucR = 200 nM; 6: HucO = 50 nM, HucR = 250 nM; HucR-DNA complexed are marked by red triangles. **(D)** HucR repression of TSMD circuit with substrate containing upstream HgaI recognition site and downstream extra sequence, as illustrated in **ii** of panel **A**; DNA substrate = 50 nM; invading probe = 1.25  $\mu$ M. **(E)** Repression of TSMD circuit with downstream HgaI recognition site by HucR, as illustrated in **iii** of panel **A**; DNA substrate = 50 nM; invading probe = 1.25  $\mu$ M. RFU in panels **D** and **E** indicates relative fluorescence units;  $n = 1$ .

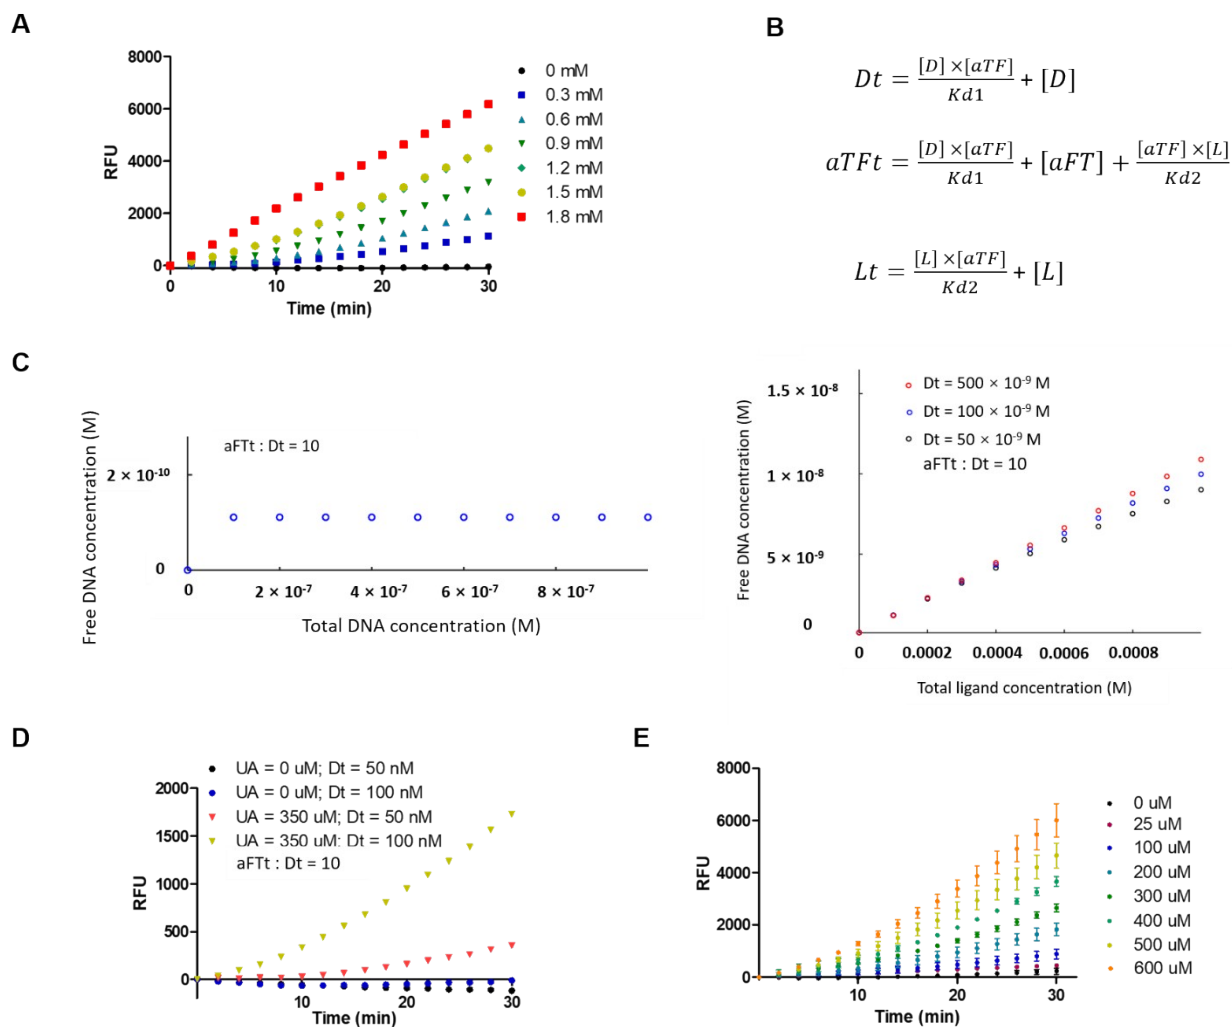

**Supplementary Figure S2.** Detection of uric acid with allosteric transcription factor (aTF)-regulated TMSD circuit. **(A)** Detection of uric acid (UA) with the one-cycle TMSD circuit. DNA substrate = 50 nM; HucR = 500 nM; IP=1.25  $\mu$ M; n=1. **(B)** Equations describing the equilibrium of DNA-aTF-DNA interaction.  $Dt$ : Total DNA concentration;  $aTFt$ : Total aTF concentration;  $Lt$ : Total ligand concentration;  $[D]$ : Free-DNA concentration;  $[aTF]$ : Free aTF concentration;  $[L]$ : Free ligand concentration;  $K_{d1}$ : dissociation constant of aTF-DNA complex;  $K_{d2}$ : dissociation constant of ligand-aTF complex. **(C)** Simulation of equilibrium concentration of free-DNA at different total DNA (left) and total ligand (right) concentrations by solving the equations in panel **B**;  $Dt$ : total DNA concentration;  $aTFt$ : total aTF concentration. **(D)** UA induction of repressed TMSD circuit; UA: uric acid sample concentration;  $Dt$ : total DNA concentration;  $aTFt$ : total aTF concentration; n=1. **(E)** UA detection with optimized TMSD circuit; error bars indicate mean  $\pm$  S.D., n = 3. RFU in panels **A**, **D** and **E** indicates relative fluorescence units.

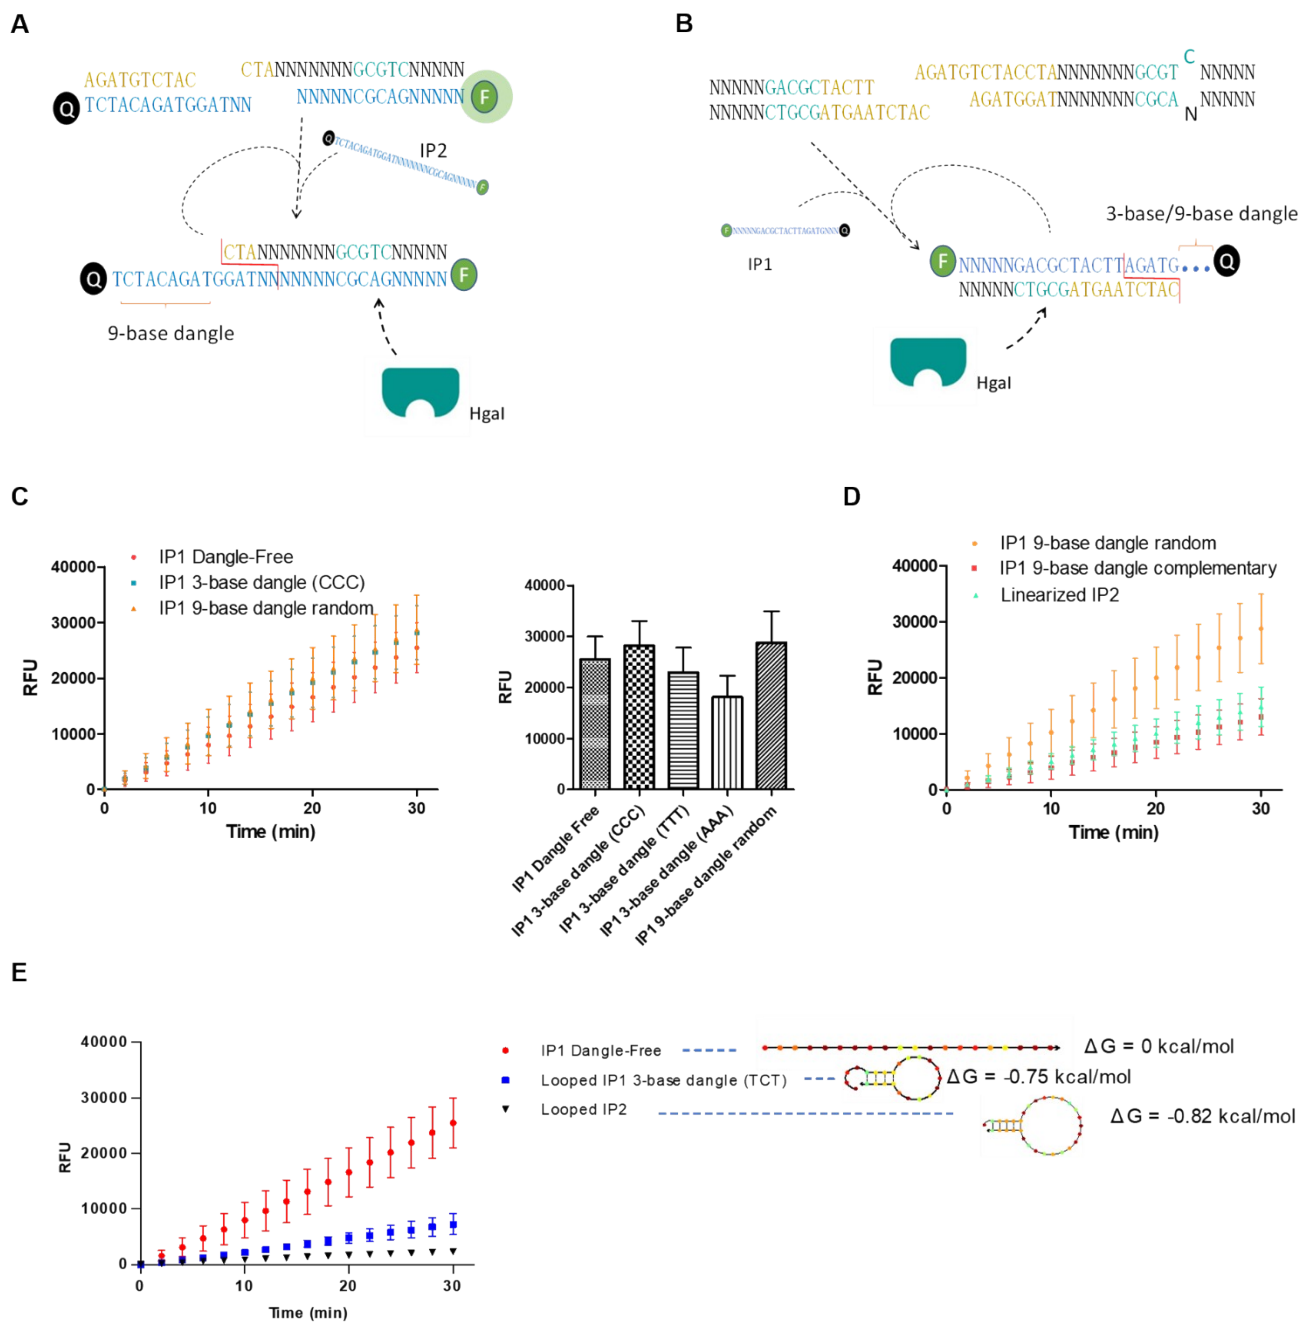

**Supplementary Figure S3.** Impact of 3' end dangles and 3' end secondary structure on TMSD-based signal amplification. **(A)** Generation of nine-base 3' dangle in cycle 2. IP2: cycle 2 invading probe. **(B)** Generation of 3' dangle in cycle 1. IP1: cycle 1 invading probe. **(C)** Signal amplification of TMSD circuit with IP1 containing dangles of different lengths and sequences. Data in the histogram was taken after 30-minute reaction. DNA template = 100 nM; IP1 = 1.25  $\mu$ M **(D)** Signal amplification of TMSD circuit with IPs containing nine-base dangles. IP2 contains inherent 9-base complementary dangle. DNA template = 100 nM; IPs = 1.25  $\mu$ M. **(E)** Signal amplification of TMSD with invading probe containing secondary structure involving the 3' end. DNA template = 100 nM; HucR = 1  $\mu$ M; IPs = 1.25  $\mu$ M. Template structure prediction and calculation of free energy were conducted with NUPACK (material: DNA; temperature: 37  $^{\circ}$ C;  $Mg^{2+}$  = 0.01 M;  $Na^{+}$  = 0.05 M). Error bars in panels C-E indicate mean  $\pm$  S.D., n=3. RFU in panels C-E indicates relative fluorescence units.

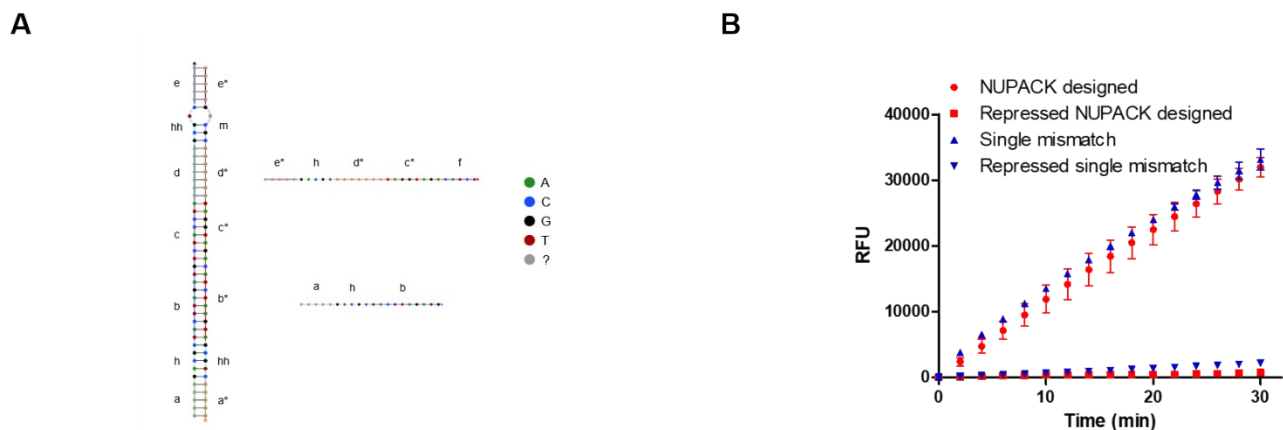

**Supplementary Figure S4.** *In-silico* design of two-cycle TMSD circuit (A) The in-input structure of DNA template and invading probes for NUPACK design. Labels a, b, c, d, e, f, h, hh, and m representing different domains; a\*, b\*, c\*, d\*, e\*, f\* representing the complementary sequences of a, b, c, d, e, f, h and hh correspond to the HgaI recognition site and its complementary sequence respectively. (B) Signal amplification and HucR repression of the NUPACK designed system. Error bars in panel B indicate mean  $\pm$  S.D. n=3. RFU in panels B indicates relative fluorescence units. Error bars in panels B indicate mean  $\pm$  S.D., n=3.

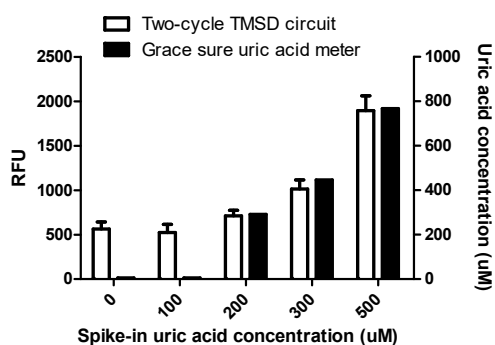

**Supplementary Figure S5.** UA detection in human serum with *in-silico* design of two-cycle TMSD circuit in comparison with a commercial UA meter. Error bars indicate mean  $\pm$  S.D., n=3. For detection by commercial UA meter n=1. RFU indicates relative fluorescence units; UA concentration in the right axis indicates the UA concentration read by the UA meter.

## Supplementary Note S1.

The NUPACK-based *in silico* design was done with the following script:

```
material = dna
magnesium = 0.01
temperature[C] = 37.0
trials = 2
sodium[M] = 0.05
structure probes = U20 + U30
structure substrate = D38 (U1 D6 + U1)
domain a = H N4
domain h = GACGC
domain hh = GCGTC
domain b = tacttAGATG
domain c = TCTACcta
domain d = N7
domain m = N5
domain e = N4 D
domain f = catct
strand A = a h b c d hh e
strand B = e* m d* c* b* hh a*
probes.seq = a h b e* h d* c* f
substrate.seq = A B
prevent = AAAA, CCCC, GGGG, UUUU, KKKKKK, MMMMMM, RRRRRR, SSSSSS, WWWWWW, YYYYYY
```

The result of the design containing sequences of the two probes and two strands of the substrate. The known sequences in the script were the sequences of HucO and HgaI recognition site. These sequences could be changed for application of different aTFs.

**Supplementary Table 1. Protein, DNA, and oligonucleotides used in the experiment.**

| No. | Name                                             | Sequences                                                                                                                                                                                                                 |
|-----|--------------------------------------------------|---------------------------------------------------------------------------------------------------------------------------------------------------------------------------------------------------------------------------|
| 1   | 6 His-TEV-HucR                                   | HHHHHHSSGLVPRGSHMENLYFQSMSARMDNDTAALLERIRSDWARLNHGQ<br>GPDS DGLTPSAGPMLTLLLLERLHAALGREIERTYAASGLNAAGWDLLLTLYRS<br>APPEGLRPTELSALAAISGPSTSNRIVRLLEKGLIERREDERDRRSASIRLTPQGR<br>ALVTHLLPAHLATTQRLAPLSAQEQRTLEELAGRMLAGLEQGV |
| 2   | HucO                                             | TAGGTAGACATCTAAGTA                                                                                                                                                                                                        |
| 3   | One-cycle substrate                              | ATAAA <u>GACGC</u> TAGGTAGACATCTAAGTA                                                                                                                                                                                     |
| 4   | One-cycle substrate'                             | TACTTAGATGTCTACCTA <u>GCGT</u> CTTTAT                                                                                                                                                                                     |
| 5   | One-cycle substrate - extended                   | ATAAA <u>GACGC</u> TAGGTAGACATCTAAGTAAATGACCTGGATACATGGCTCAGT                                                                                                                                                             |
| 6   | One-cycle substrate - extended'                  | ACTGAGCCATGTATCCAGGTCATTTACTTAGATGTCTACCTA <u>GCGT</u> CTTTAT                                                                                                                                                             |
| 7   | IP - one-cycle extended                          | 5'-FAM-ATAAA <u>GACGC</u> TAGGTAGACATCT-3'BHQ1                                                                                                                                                                            |
| 8   | One-cycle substrate - downstream HgaI site       | ATAAAGTTACTAGGTAGACATCTAAGTA <u>GCGT</u> CTCCTG                                                                                                                                                                           |
| 9   | One-cycle substrate - downstream HgaI site'      | CAGGA <u>GACGC</u> TACTTAGATGTCTACCTAGTAACCTTTAT                                                                                                                                                                          |
| 10  | IP - downstream HgaI site - TCT dangle           | 5'-FAM-CAGGA <u>GACGC</u> TACTTAGATGTCT-3'BHQ1                                                                                                                                                                            |
| 11  | Two-cycle substrate - looped IP2                 | AAGAT <u>GACGC</u> TACTTAGATGTCTACCTAATAAGTT <u>GCGt</u> CATCTT                                                                                                                                                           |
| 12  | Two-cycle substrate - looped IP2'                | AAGATacCGCAACTTATTAGGTAGACATCTAAGTA <u>GCGT</u> CATCTT                                                                                                                                                                    |
| 13  | Looped IP2                                       | 5'-FAM-AAGAT <u>GACGC</u> AACTTAT TAGGTAGACATCT-3'BHQ1                                                                                                                                                                    |
| 14  | Two-cycle substrate - double mismatch            | AAGAT <u>GACGC</u> TACTTAGATGTCTACCTAATAAGTT <u>GCGt</u> TATAG                                                                                                                                                            |
| 15  | Two-cycle substrate - double mismatch'           | CTATAacCGCAACTTATTAGGTAGACATCTAAGTA <u>GCGT</u> CATCTT                                                                                                                                                                    |
| 16  | Two-cycle substrate - single mismatch            | AAGAT <u>GACGC</u> TACTTAGATGTCTACCTAATAAGTT <u>GCGt</u> TATAG                                                                                                                                                            |
| 17  | Two-cycle substrate - single mismatch'           | CTATAGcCGCAACTTATTAGGTAGACATCTAAGTA <u>GCGT</u> CATCTT                                                                                                                                                                    |
| 18  | IP1 - dangle free                                | 5'-FAM-AAGAT <u>GACGC</u> TACTTAGATG-3'BHQ1                                                                                                                                                                               |
| 19  | IP1 - CCC dangle                                 | 5'-FAM-AAGAT <u>GACGC</u> TACTTAGATGCCC-3'BHQ1                                                                                                                                                                            |
| 20  | IP1 - AAA dangle                                 | 5'-FAM-AAGAT <u>GACGC</u> TACTTAGATGAAA-3'BHQ1                                                                                                                                                                            |
| 21  | IP1 - TTT dangle                                 | 5'-FAM-AAGAT <u>GACGC</u> TACTTAGATGTTT-3'BHQ1                                                                                                                                                                            |
| 22  | IP1 - 9-base random dangle                       | 5'-FAM-AAGAT <u>GACGC</u> TACTTAGATGCCCTATATAA-3'BHQ1                                                                                                                                                                     |
| 23  | IP1 - 9-base complementary dangle                | 5'-FAM-AAGAT <u>GACGC</u> TACTTAGATGTCTACCTAAT-3'BHQ1                                                                                                                                                                     |
| 24  | IP2 - optimized                                  | 5'-FAM-CTATAG <u>GACGC</u> AACTTATTAGGTAGACATCT-3'BHQ1                                                                                                                                                                    |
| 25  | Two-cycle substrate - <i>in silico</i> designed  | CCATT <u>GtCGC</u> GATTAGTTAGGTAGACATCTAAGTA <u>GCGT</u> CGTGGG                                                                                                                                                           |
| 26  | Two-cycle substrate - <i>in silico</i> designed' | CCCAC <u>GACGC</u> TACTTAGATGTCTACCTAACTAAT <u>CGGt</u> CAATGG                                                                                                                                                            |
| 27  | IP1 - <i>in silico</i> designed                  | 5'-FAM-CCCAC <u>GACGC</u> TACTTAGATG-3'BHQ1                                                                                                                                                                               |
| 28  | IP2 - <i>in silico</i> designed                  | 5'-FAM-CCATT <u>GACGC</u> GATTAGTTAGGTAGACATCT-3'BHQ1                                                                                                                                                                     |

Sequences underlined indicate HucO sequence. Sequences in red indicate HgaI recognition site. Lower case letters indicate mismatch site.

**Supplementary Table 2. Comparison among different aTF-based UA biosensor and a commercial UA meter.**

|                 | aTF-based UA biosensors |             |                                              |                                                            | Commercial uric acid meter |
|-----------------|-------------------------|-------------|----------------------------------------------|------------------------------------------------------------|----------------------------|
|                 | Two-cycle TMSD          | CaT-SMelor  | <i>Hind</i> III-HF-qPCR/<br>Alpha            | aTF-NAST                                                   |                            |
| Detection range | 25 – 600 $\mu$ M        | 25 – 500 nM | 5 – 300 nM/<br>0.1 – 10 $\mu$ M <sup>a</sup> | 10 – 600 nM/<br>10 – 200 nM<br>0.0005 – 10 nM <sup>b</sup> | 179 – 1190 $\mu$ M         |
| Turnaround      | ca. 15 min              | 15 – 25 min | 70 – 110 min <sup>c</sup>                    | 70 – 170 min <sup>d</sup>                                  | 30 s                       |

|                         |                                     |                                            |                                           |                                     |                                  |
|-------------------------|-------------------------------------|--------------------------------------------|-------------------------------------------|-------------------------------------|----------------------------------|
| time                    |                                     |                                            |                                           |                                     |                                  |
| Operation steps         | 1                                   | 3 <sup>e</sup>                             | 4 <sup>c</sup>                            | 3 <sup>d</sup>                      | 1                                |
| Modularity <sup>f</sup> | aTF responding to targeted molecule | Cellulose binding domain fused aTF         | Operator sequence constraint <sup>g</sup> | aTF responding to targeted molecule | Target-specific electrode        |
| Sample type             | Saliva                              | Whole blood/ serum                         | Serum                                     | Serum                               | Whole blood/ Serum               |
| Equipment <sup>h</sup>  | Incubator, fluorescence reader      | Incubator, centrifuge, fluorescence reader | Real-time PCR system/ microplate reader.  | Incubator, fluorescence reader      | Portable electrochemical device. |
| Source                  | This work                           | 1                                          | 2                                         | 3                                   | Grace Medical                    |

<sup>a</sup>. *HindIII*-HF-qPCR: 5 – 300 nM; *HindIII*-HF-Alpha: 0.1 – 10 μM.<sup>2</sup>

<sup>b</sup>. aTF – NAST (qPCR): 10 – 600 nM; aTF – NAST (RCA): 10 – 200 nM; aTF – NAST (RPA): 0.0005 – 10 nM.<sup>3</sup>

<sup>c</sup>. 20 – 25 min HucR binding, 15 – 20 min *HindIII* reaction, 10-min inactivation plus qPCR (40-cycle qPCR where each cycle contains 95 °C 5 s, 55 °C 10 s, and 72 °C 15 s) or Alpha luminescence (slow cool-down and 60-min incubation in dark).<sup>2</sup>

<sup>d</sup>. 20-min aTF-DNA binding, 30-min ligation and signal amplification range from 20 min (RPA) to 2 hours (RCA).<sup>3</sup>

<sup>e</sup>. Step 1: Setup; step 2: incubation; step 3: detection and data analysis.<sup>1</sup>

<sup>f</sup>. Requirements for applying the system to another target small molecule.

<sup>g</sup>. This design utilized a modified HucO sequence overlapping with *HindIII* recognition site.<sup>2</sup>

## Reference

1. M. Liang, Z. Li, W. Wang, J. Liu, L. Liu, G. Zhu, L. Karthik, M. Wang, K. F. Wang, Z. Wang, J. Yu, Y. Shuai, J. Yu, L. Zhang, Z. Yang, C. Li, Q. Zhang, T. Shi, L. Zhou, F. Xie, H. Dai, X. Liu, J. Zhang, G. Liu, Y. Zhuo, B. Zhang, C. Liu, S. Li, X. Xia, Y. Tong, Y. Liu, G. Alterovitz, G. Y. Tan and L. X. Zhang, *Nat Commun*, 2019, **10**, 3672.
2. Y. Yao, S. Li, J. Cao, W. Liu, F. Qi, W. Xiang, K. Yang, W. Wang and L. Zhang, *Applied microbiology and biotechnology*, 2018, **102**, 7489-7497.
3. J. Cao, Y. Yao, K. Fan, G. Tan, W. Xiang, X. Xia, S. Li, W. Wang and L. Zhang, *Science advances*, 2018, **4**, eaau4602.
